# Supplementary material for: Identification and Validation of Novel Reference Genes in Acute Lymphoblastic Leukemia for Droplet Digital PCR
Source: PubMed Central journal article supplement (PMC6562415; doi:10.3390/genes10050376), 2019-05-17
Supplement: genes-10-00376-s001.pdf [file genes-10-00376-s001.pdf]

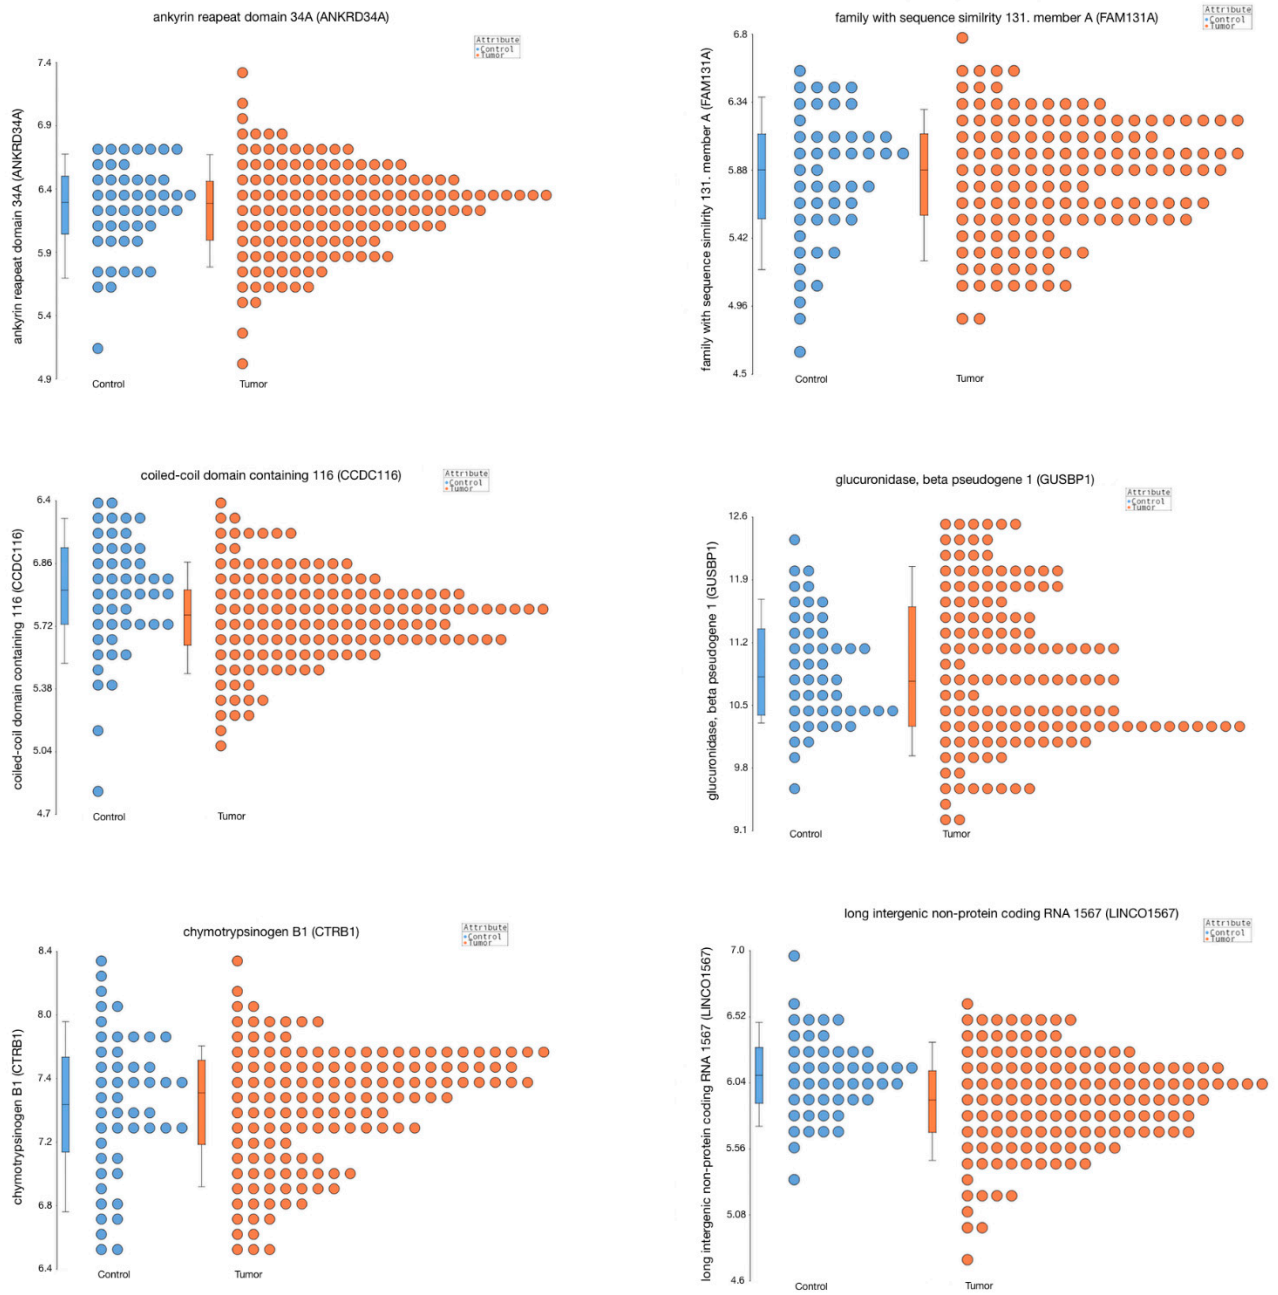

**Figure S1.** Six candidate genes that did not vary in gene expression in childhood cancer and healthy tissues. Dot plot of six genes with nonvarying expression level, *ANKRD34D*, *CCDC116*, *CTRB1*, *FAM131A*, *GUSBP1* and *LINC01567*. The blue dots represent healthy tissue and the red dots represent childhood cancer.

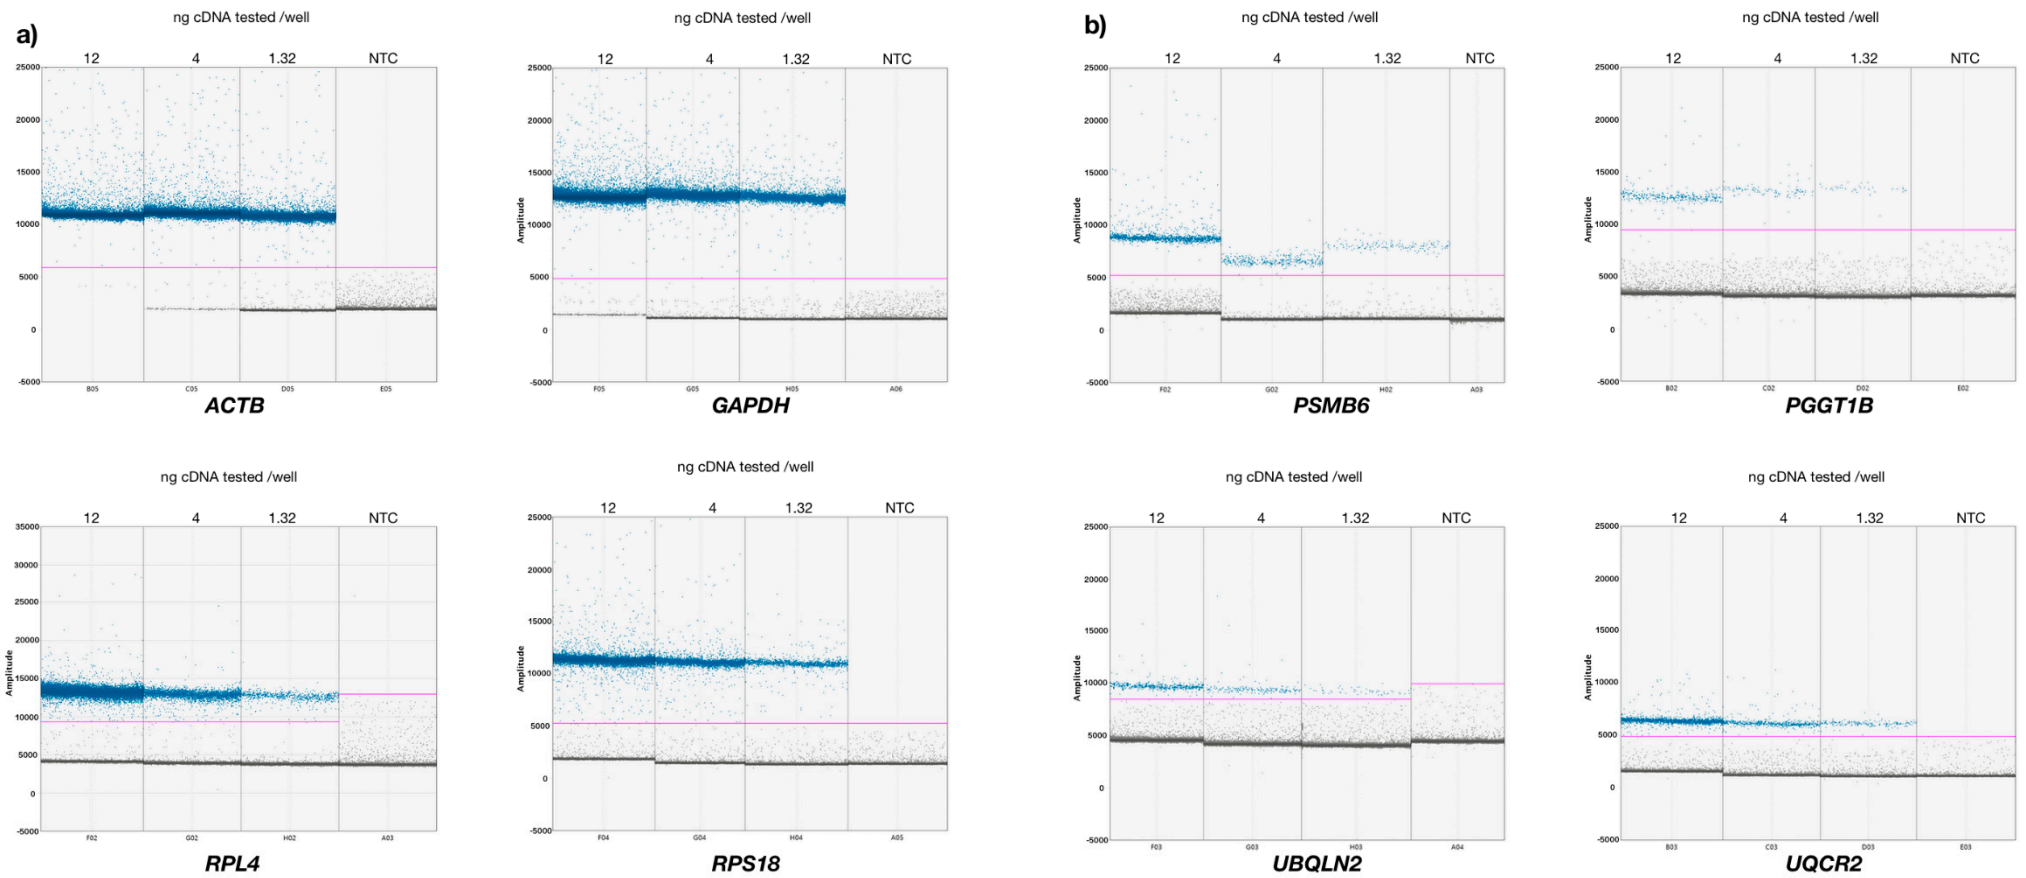

**Figure 2.** Amplification linearity of reference genes by ddPCR assay. **a)** ddPCR analysis plot showing linear amplification in serial dilutions of 1:3 of cDNA SUP-B15 for classical reference genes and **b)** new reference genes. Blue dots indicate positive amplification droplets and gray dots indicate negative amplification droplets. The pink line represents the cut-off of the positive and negative droplets.

**Table 1.** Database of childhood cancer microarrays for data mining of ArrayExpress.

| <b>Sample type ID</b>                                                                                           | <b>Number of microarrays</b> |
|-----------------------------------------------------------------------------------------------------------------|------------------------------|
| Osteosarcoma<br>GSE11414, GSE12865, GSE26244, GSE32395, GSE42903, GSE46549, GSE48281,<br>GSE50532, GSE73166     | 125                          |
| Hodgkin lymphoma<br>GSE64232, GSE52710, GSE44244, GSE41493, GSE29545, GSE35224, GSE23591,<br>GSE21296, GSE22550 | 172                          |
| Rhabdomyosarcoma<br>GSE15703, GSE22594, GSE27389                                                                | 32                           |
| Retinoblastoma<br>GSE21147, GSE24673, GSE34379, GSE32381, GSE48989                                              | 41                           |
| Neuroblastoma<br>GSE26458, GSE34234, GSE34420, GSE59899, GSE78061, GSE66586, GSE56003,<br>GSE34422, GSE51512    | 59                           |
| Medulloblastoma<br>GSE51020, GSE41842, GSE36947                                                                 | 31                           |
| Bone marrow<br>GSE47552, GSE34015                                                                               | 10                           |
| Skeletal muscle<br>GSE26276                                                                                     | 3                            |
| Fibroblasts<br>GSE48761                                                                                         | 10                           |
| Retina<br>GSE24673                                                                                              | 2                            |
| Liver<br>GSE46960                                                                                               | 31                           |
| Neuron<br>GSE65106, GSE56899                                                                                    | 82                           |
| Leukemia<br>GSE48558                                                                                            | 170                          |

**Table S2.** Database of childhood cancer microarrays that passed quality control and were then used for the gene expression analysis.

| <b>Sample type</b> | <b>ID</b> | <b>Name of the microarrays</b>                                                                                                                                                                                                                                                                                                                                                                                                                         |
|--------------------|-----------|--------------------------------------------------------------------------------------------------------------------------------------------------------------------------------------------------------------------------------------------------------------------------------------------------------------------------------------------------------------------------------------------------------------------------------------------------------|
| Osteosarcoma       | GSE12865  | GSM322691, GSM322692, GSM322693, GSM322694, GSM322695, GSM322696, GSM322697, GSM322698, GSM322699, GSM322700, GSM322701, GSM322702                                                                                                                                                                                                                                                                                                                     |
|                    | GSE48281  | GSM1174178, GSM1174179, GSM1174180, GSM1174181                                                                                                                                                                                                                                                                                                                                                                                                         |
| Hodgkin lymphoma   | GSE29545  | GSM731549, GSM731550, GSM731551, GSM731552, GSM731553, GSM731554, GSM731555, GSM731556                                                                                                                                                                                                                                                                                                                                                                 |
|                    | GSE35224  | GSM864079, GSM864080, GSM864081, GSM864082, GSM864083, GSM864084, GSM864085, GSM864086, GSM864087, GSM864088, GSM864089, GSM864090, GSM864091, GSM864092, GSM864093, GSM864094                                                                                                                                                                                                                                                                         |
|                    | GSE23591  | GSM578573, GSM578574, GSM578575, GSM578576, GSM578577, GSM578578, GSM578579, GSM578580, GSM578581, GSM578582, GSM578583, GSM578584, GSM578585, GSM578586, GSM578587, GSM578588, GSM578589, GSM578590, GSM578591, GSM578592, GSM578593, GSM578594, GSM578595, GSM578596, GSM578597, GSM578598, GSM578599, GSM578600, GSM578601, GSM578602, GSM578603, GSM578604, GSM578605, GSM578606, GSM578607, GSM578608, GSM578609, GSM578610, GSM578611, GSM578612 |
|                    | GSE21296  | GSM532266, GSM532267, GSM532268, GSM532269, GSM532270, GSM532271, GSM532272, GSM532273                                                                                                                                                                                                                                                                                                                                                                 |
| Retinoblastoma     | GSE21147  | GSM529473, GSM529474, GSM529475, GSM529476, GSM529477, GSM529478                                                                                                                                                                                                                                                                                                                                                                                       |
|                    | GSE24673  | GSM607938, GSM607939                                                                                                                                                                                                                                                                                                                                                                                                                                   |
| Neuroblastoma      | GSE26458  | GSM649476, GSM649477, GSM649478, GSM649479, GSM649480, GSM649481, GSM649482, GSM649483                                                                                                                                                                                                                                                                                                                                                                 |
|                    | GSE56003  | GSM1350100, GSM1350101, GSM1350102, GSM1350103, GSM1350104, GSM1350105                                                                                                                                                                                                                                                                                                                                                                                 |
|                    | GSE34422  | GSM848793, GSM848794, GSM848795                                                                                                                                                                                                                                                                                                                                                                                                                        |
| Medulloblastoma    | GSE41842  | GSM1025529, GSM1025530, GSM1025531, GSM1025532, GSM1025533, GSM1025534, GSM1025537, GSM1025544, GSM1025545, GSM1025546                                                                                                                                                                                                                                                                                                                                 |
| Bone marrow        | GSE47552  | GSM1152350, GSM1152351, GSM1152352, GSM1152353, GSM1152354                                                                                                                                                                                                                                                                                                                                                                                             |
| Skeletal muscle    | GSE26276  | GSM645298, GSM645299, GSM645300                                                                                                                                                                                                                                                                                                                                                                                                                        |
| Fibroblasts        | GSE48761  | GSM1184255, GSM1184257, GSM1184261                                                                                                                                                                                                                                                                                                                                                                                                                     |
| Retina             | GSE24673  | GSM607947, GSM607948                                                                                                                                                                                                                                                                                                                                                                                                                                   |
| Liver              | GSE46960  | GSM1142116, GSM1142117, GSM1142118, GSM1142119, GSM1142120, GSM1142121, GSM1142122, GSM1142123, GSM1142124, GSM1142125, GSM1142126, GSM1142127, GSM1142128, GSM1142129, GSM1142130, GSM1142131, GSM1142132, GSM1142133, GSM1142134, GSM1142135, GSM1142136, GSM1142138, GSM1142139, GSM1142140, GSM1142141, GSM1142142, GSM1142143, GSM1142144, GSM1142145                                                                                             |
| Neuron             | GSE65106  | GSM1587377, GSM1587406                                                                                                                                                                                                                                                                                                                                                                                                                                 |
| Leukemia           | GSE48558  | GSM1180810, GSM1180813, GSM118016, GSM1180787, GSM1180791, GSM1180795, GSM1180798, GSM1180801, GSM1180804, GSM1180807, GSM1180818, GSM1180829, GSM1180841, GSM1180845, GSM1180769, GSM1180771, GSM1180764, GSM1180775, GSM1180808, GSM1180842, GSM1180785, GSM1180779, GSM1180780, GSM1180782, GSM1180811, GSM1180840                                                                                                                                  |
